# Supplementary material for: Soybean (Glycine max L.) Lipoxygenase 1 (LOX 1) Is Modulated by Nitric Oxide and Hydrogen Sulfide: An In Vitro Approach
Source: MDPI journal article supplement (doi:10.3390/ijms24098001), 2023-04-28
Supplement: s1 [file s1]

**Table S1. Main features of the tunnels identified by Caver that connect C127 with the surface of soybean LOX 1 (PDB entry 3PZW).** Tunnels are scored by the throughput parameter that ranges from 0 to 1 and accounts for the probability of a tunnel to be used as a channel.

| <b>Tunnel</b> | <b>Bottleneck (Å)</b> | <b>Length (Å)</b> | <b>Curvature<sup>1</sup></b> | <b>Throughput</b> | <b>Quartile</b> |
|---------------|-----------------------|-------------------|------------------------------|-------------------|-----------------|
| #1            | 1.1                   | 15.5              | 1.6                          | 0.77              | Q1              |
| #2            | 1.1                   | 18.0              | 1.5                          | 0.64              | Q1              |
| #3            | 1.1                   | 18.4              | 1.3                          | 0.57              | Q2              |
| #4            | 0.9                   | 16.4              | 1.8                          | 0.55              | Q2              |
| #5            | 1.1                   | 23.3              | 1.6                          | 0.55              | Q2              |
| #6            | 0.9                   | 16.6              | 1.6                          | 0.51              | Q2              |
| #7            | 0.9                   | 16.6              | 1.4                          | 0.48              | Q2              |
| #8            | 0.9                   | 20.2              | 1.3                          | 0.45              | Q2              |
| #9            | 1.0                   | 40.4              | 2.1                          | 0.28              | Q3              |
| #10           | 0.9                   | 49.8              | 2.5                          | 0.20              | Q3              |
| #11           | 0.9                   | 50.2              | 2.4                          | 0.19              | Q3              |
| #12           | 0.9                   | 43.4              | 1.8                          | 0.15              | Q4              |
| #13           | 1.0                   | 72.4              | 1.8                          | 0.09              | Q4              |
| #14           | 0.9                   | 68.0              | 1.6                          | 0.09              | Q4              |
| #15           | 1.0                   | 76.7              | 1.8                          | 0.07              | Q4              |
| #16           | 1.0                   | 90.1              | 1.7                          | 0.05              | Q4              |
| #17           | 1.0                   | 94.7              | 1.6                          | 0.03              | Q4              |
| #18           | 1.0                   | 98.3              | 2.0                          | 0.02              | Q4              |

<sup>1</sup> Ratio between the length of the tunnel and the shortest possible distance between the starting point of the tunnel and the ending point

**Table S2. Main features of the tunnels identified by Caver that connect C492 with the surface of soybean LOX 1 (PDB entry 3PZW).** Tunnels are scored by the throughput parameter that ranges from 0 to 1 and accounts for the probability of a tunnel to be used as a channel.

| <b>Tunnel</b> | <b>Bottleneck (Å)</b> | <b>Length (Å)</b> | <b>Curvature<sup>1</sup></b> | <b>Throughput</b> | <b>Quartile</b> |
|---------------|-----------------------|-------------------|------------------------------|-------------------|-----------------|
| #1            | 1.0                   | 15.0              | 1.3                          | 0.54              | Q1              |
| #2            | 1.0                   | 25.3              | 2.0                          | 0.29              | Q1              |
| #3            | 1.0                   | 34.8              | 1.7                          | 0.24              | Q2              |
| #4            | 1.0                   | 38.8              | 1.3                          | 0.21              | Q2              |
| #5            | 1.0                   | 37.5              | 1.3                          | 0.20              | Q2              |
| #6            | 0.9                   | 33.0              | 2.6                          | 0.19              | Q2              |
| #7            | 1.0                   | 32.9              | 1.5                          | 0.19              | Q2              |
| #8            | 1.0                   | 54.9              | 2.5                          | 0.11              | Q2              |
| #9            | 1.0                   | 74.3              | 1.9                          | 0.09              | Q3              |
| #10           | 0.9                   | 53.7              | 2.4                          | 0.07              | Q3              |
| #11           | 1.0                   | 63.3              | 2.2                          | 0.05              | Q3              |
| #12           | 1.0                   | 84.4              | 1.7                          | 0.05              | Q4              |
| #13           | 0.9                   | 88.7              | 2.5                          | 0.04              | Q4              |
| #14           | 0.9                   | 82.4              | 3.1                          | 0.03              | Q4              |
| #15           | 0.9                   | 101.4             | 6.3                          | 0.01              | Q4              |
| #16           | 0.9                   | 111.3             | 3.1                          | 0.00              | Q4              |

<sup>1</sup> Ratio between the length of the tunnel and the shortest possible distance between the starting point of the tunnel and the ending point

**Table S3. Main features of the tunnels identified by Caver that connect C679 with the surface of soybean LOX 1 (PDB entry 3PZW).** Tunnels are scored by the throughput parameter that ranges from 0 to 1 and accounts for the probability of a tunnel to be used as a channel.

| Tunnel | Bottleneck (Å) | Length (Å) | Curvature <sup>1</sup> | Throughput | Quartile |
|--------|----------------|------------|------------------------|------------|----------|
| #1     | 0.9            | 17.7       | 1.6                    | 0.31       | -        |

<sup>1</sup> Ratio between the length of the tunnel and the shortest possible distance between the starting point of the tunnel and the ending point

**Table S4. Main features of the tunnels identified by Caver that connect Y214 with the surface of soybean LOX 1 (PDB entry 3PZW).** Tunnels are scored by the throughput parameter that ranges from 0 to 1 and accounts for the probability of a tunnel to be used as a channel.

| Tunnel | Bottleneck (Å) | Length (Å) | Curvature <sup>1</sup> | Throughput | Quartile |
|--------|----------------|------------|------------------------|------------|----------|
| #1     | 1.0            | 22.0       | 1.6                    | 0.30       | Q1       |
| #2     | 1.0            | 30.3       | 1.4                    | 0.16       | Q2       |
| #3     | 0.9            | 31.3       | 2.5                    | 0.15       | Q2       |
| #4     | 1.0            | 46.4       | 1.9                    | 0.13       | Q3       |
| #5     | 0.9            | 40.7       | 1.8                    | 0.12       | Q3       |
| #6     | 0.9            | 44.9       | 2.5                    | 0.08       | Q3       |
| #7     | 1.0            | 62.6       | 1.19                   | 0.07       | Q4       |
| #8     | 0.9            | 79.2       | 2.2                    | 0.06       | Q4       |
| #9     | 0.9            | 51.2       | 1.5                    | 0.05       | Q4       |
| #10    | 1.0            | 92.1       | 2.3                    | 0.03       | Q4       |
| #11    | 0.9            | 96.4       | 4.1                    | 0.02       | Q4       |
| #12    | 0.9            | 109.0      | 8.3                    | 0.00       | Q4       |
| #13    | 0.9            | 119.0      | 3.5                    | 0.00       | Q4       |

<sup>1</sup> Ratio between the length of the tunnel and the shortest possible distance between the starting point of the tunnel and the ending point
